# Supplementary material for: An electrically stable and mechanically robust stretchable fiber conductor prepared by dip-coating silver nanowires on porous elastomer yarn
Source: Royal Society of Chemistry journal article supplement (doi:10.1039/d3ma00013c), 2023-01-01
Supplement: d3ma00013c1.pdf [file d3ma00013c1.pdf]

## Supporting information

### **Electrically Stable and Mechanically Robust Stretchable Fiber Conductor**

#### **Prepared by Dip-coating Silver Nanowires on Porous Elastomer Yarn**

*Xin He<sup>a</sup>, Ningjing Zhou<sup>a</sup>, Yushan Li<sup>a</sup>, Puxian Xiong<sup>a</sup>, Shuai Zhang<sup>c,\*</sup>, Zhijun Ma<sup>b,\*</sup>*

<sup>a</sup> State Key Laboratory of Luminescent Materials & Devices, Guangdong Engineering Technology Research and Development Center of Special Optical Fiber Materials and Devices, Guangdong Provincial Key Laboratory of Fiber Laser Materials and Applied Techniques, School of Materials Science and Engineering, South China University of Technology, Guangzhou 510641, China

<sup>b</sup> Zhejiang Lab, Hangzhou, 311100 P. R. China

<sup>c</sup> Zhejiang Chinese Medical University, Hangzhou, 311100 P. R. China

\*Corresponding author.

E-mail:

Shuai Zhang: zhsrenl@163.com

Zhijun Ma: zhijma@scut.edu.cn

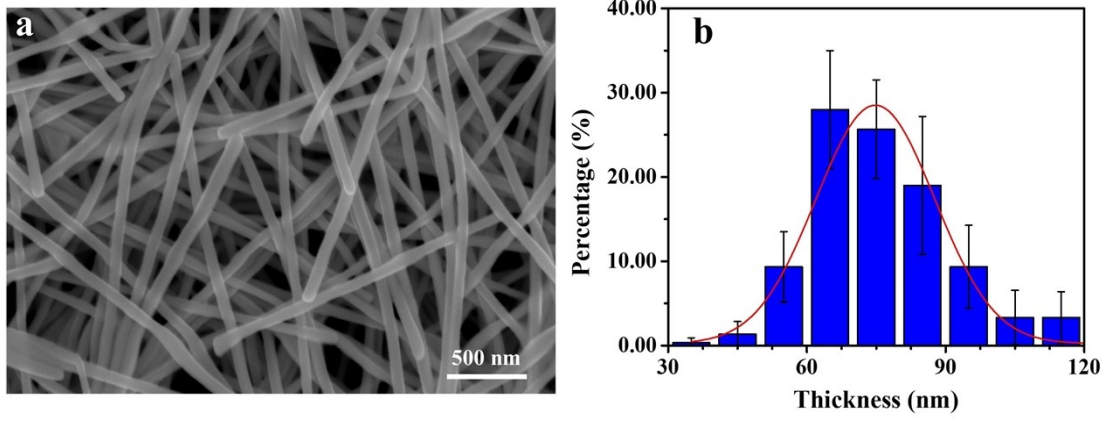

**Fig. S1** SEM image (a) and distribution curve of thickness of the AgNWs used in this work

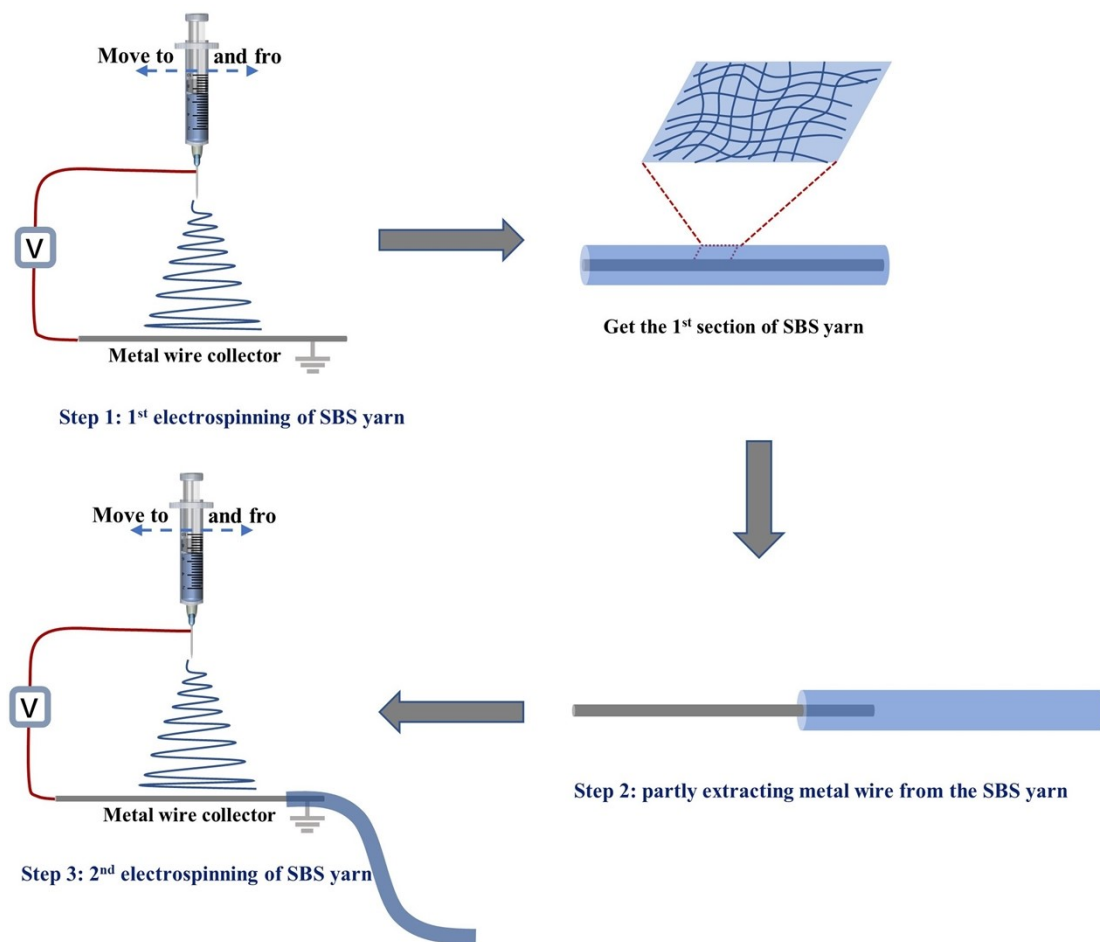

Repeating step 1 to step 3 will get the final continuous SBS yarn with desired length

**Fig. S2** A scheme for preparation of continuously long pSBS yarn.

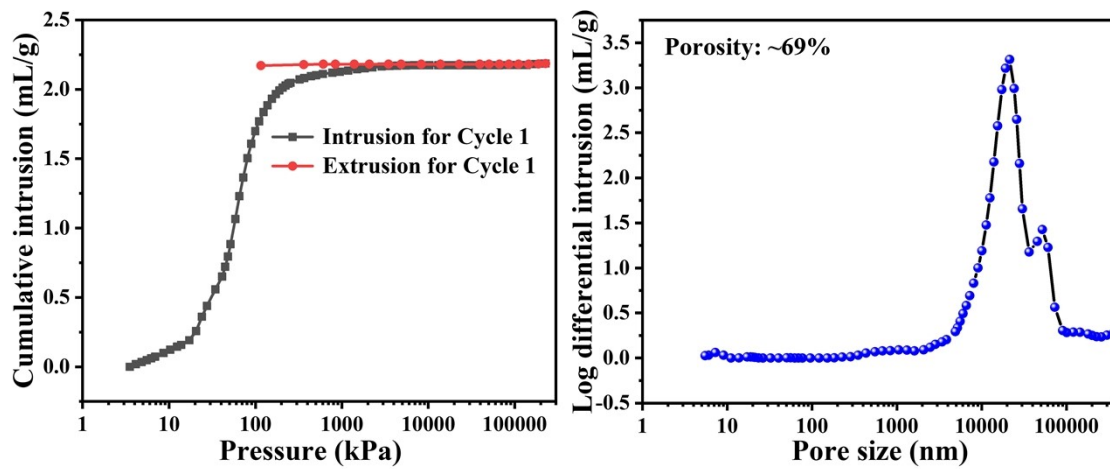

**Fig. S3** Mercury intrusion isotherm curves (a) and the corresponding pore-size distribution curve (b) of the AgNWs@pSBS fiber.

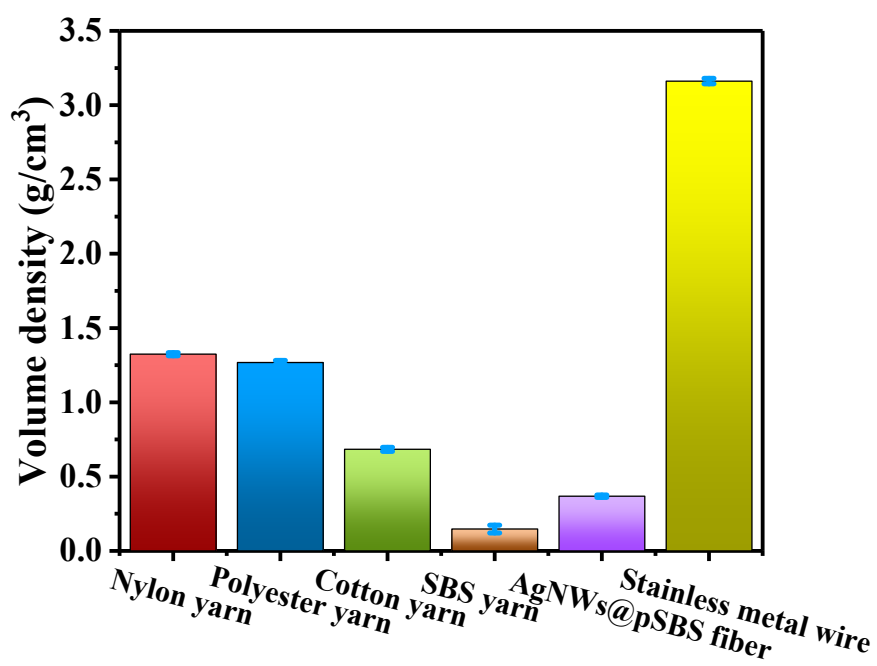

**Fig. S4** The volume density of commercial yarns, pSBS-20-8 yarn, AgNWs@pSBS-20-8 fiber and stainless metal wire.

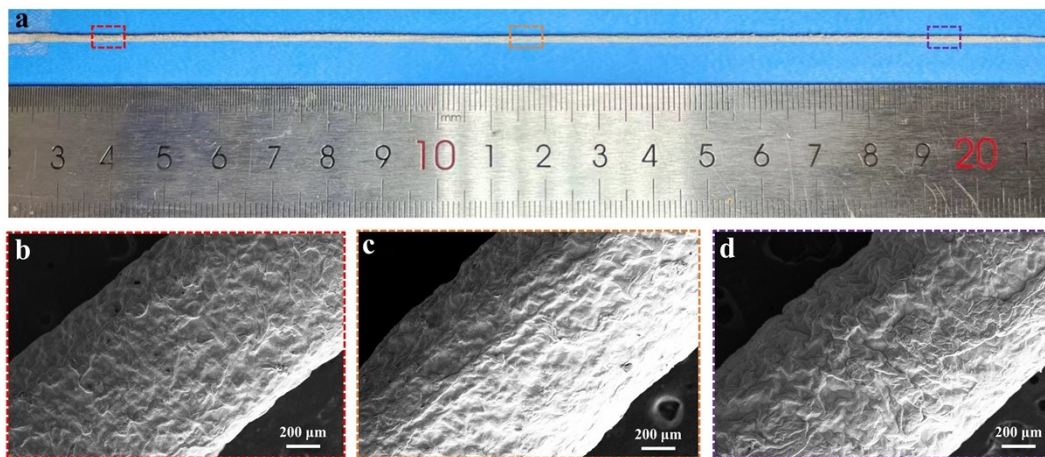

**Fig. S5** Digital photo (a) of a typical AgNWs-pSBS-20-8 fiber and its SEM images (b-d) collected at different parts marked by the colored boxes.

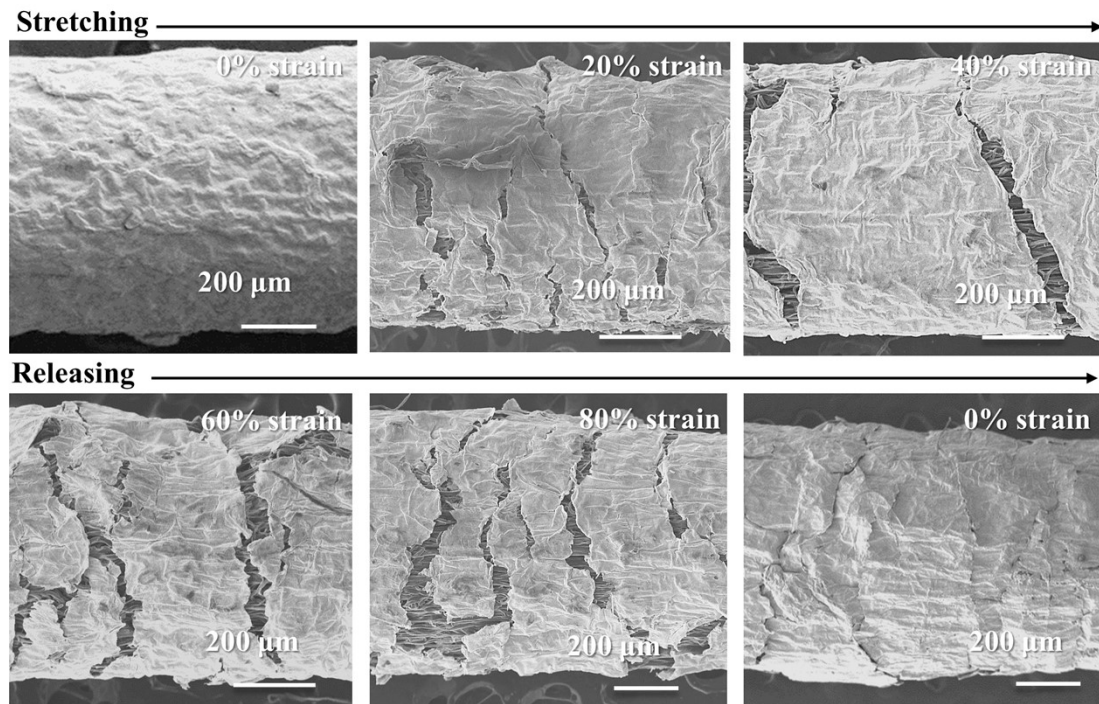

**Fig. S6** SEM images of an AgNWs@pSBS-20-8 fiber under different strains during the stretching and releasing process.

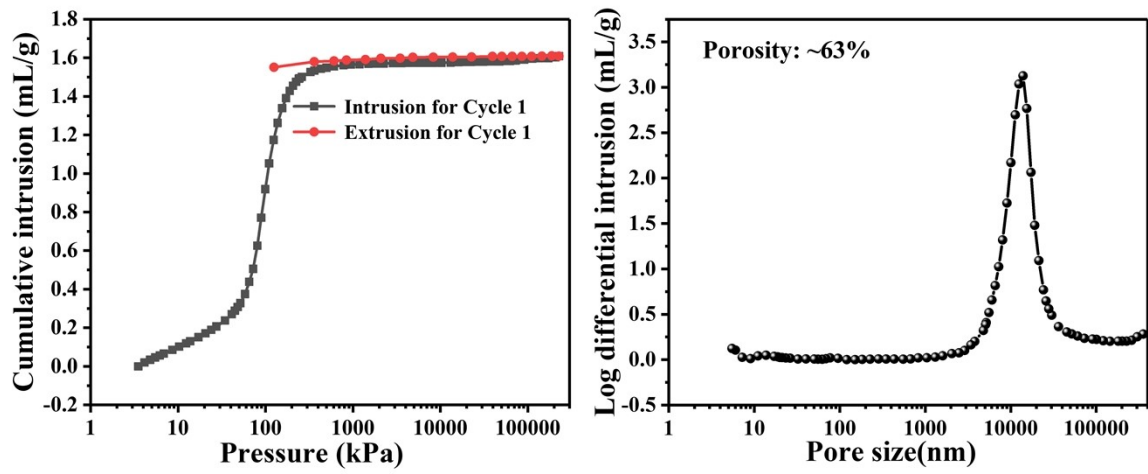

**Fig. S7** Mercury intrusion isotherm curves (a) and the corresponding pore-size distribution curve (b) of the pSBS@AgNWs@pSBS fiber.



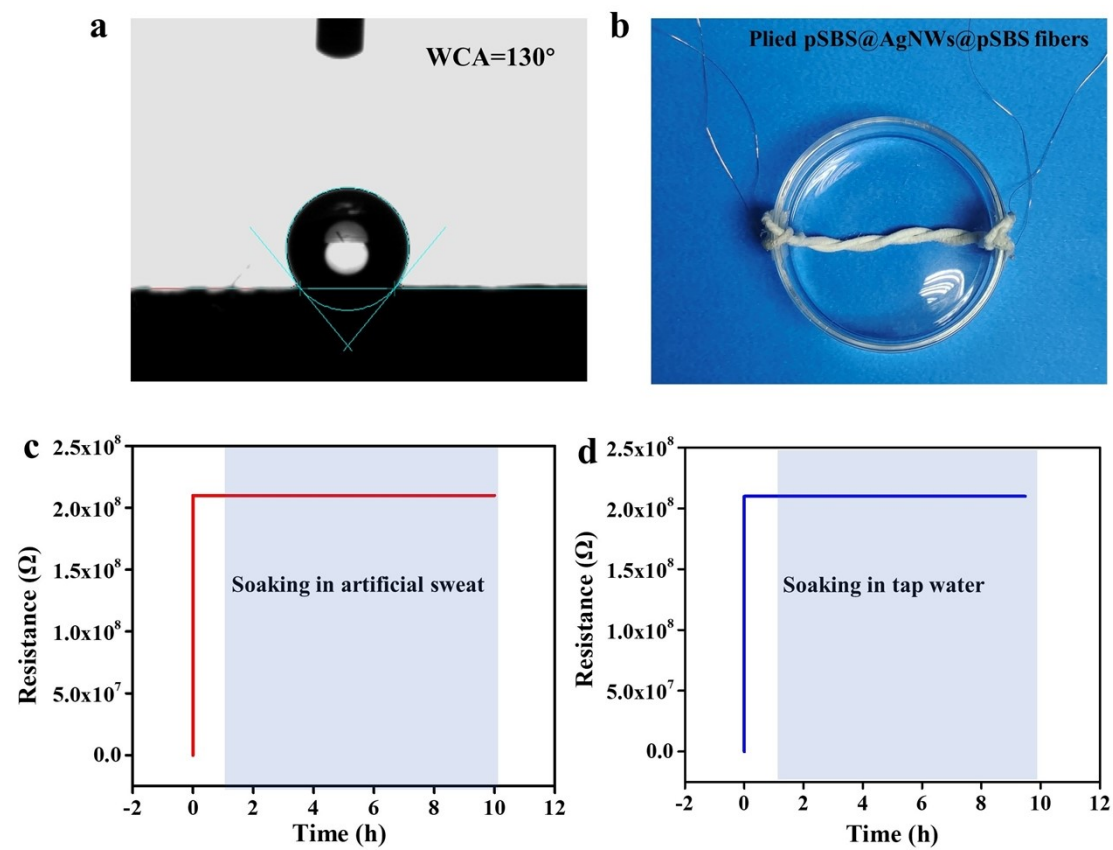

**Fig. S8** (a) Water contact angle on a pSBS@AgNWs@pSBS fiber. (b) Digital photo of one pair of plied pSBS@AgNWs@pSBS fibers soaked in artificial sweat. (c), (d) Resistance change of the plied pSBS@AgNWs@pSBS fibers during soaking in artificial sweat and tap water.

---

**Table S1** Original data for statistical calculating the average diameter and the corresponding mean square error of an AgNWs-pSBS-20-8 fiber.

| Measuring number | Data (mm) | Measuring number | Data (mm) | Measuring number | Data (mm) |
|------------------|-----------|------------------|-----------|------------------|-----------|
| 1                | 1.26376   | 11               | 1.37485   | 21               | 1.26748   |
| 2                | 1.26376   | 12               | 1.37485   | 22               | 1.26748   |
| 3                | 1.26376   | 13               | 1.37485   | 23               | 1.26748   |
| 4                | 1.26376   | 14               | 1.37485   | 24               | 1.26748   |
| 5                | 1.26376   | 15               | 1.37485   | 25               | 1.26748   |
| 6                | 1.26376   | 16               | 1.37485   | 26               | 1.26748   |
| 7                | 1.26376   | 17               | 1.37485   | 27               | 1.26748   |
| 8                | 1.26376   | 18               | 1.37485   | 28               | 1.26748   |
| 9                | 1.26376   | 19               | 1.37485   | 29               | 1.26748   |
| 10               | 1.26376   | 20               | 1.37485   | 30               | 1.26748   |
